# Supplementary material for: Unraveling Transcriptome Profile, Epigenetic Dynamics, and Morphological Changes in Psoriasis-like Keratinocytes: “Insights into Similarity with Psoriatic Lesional Epidermis”
Source: MDPI journal article supplement (doi:10.3390/cells12242825), 2023-12-12
Supplement: s1 [file s1]

**Table S1.** Real-time RT-PCR TaqMan assay probes

| Number | Gene symbol | Assay ID      | Catalog Number |
|--------|-------------|---------------|----------------|
| 1      | VIM         | Hs00958111_m1 | 4331182        |
| 2      | CLDN1       | Hs00221623_m1 |                |
| 3      | KRT1        | Hs00196158_m1 |                |
| 4      | KRT10       | Hs00166289_m1 |                |
| 5      | KRT15       | Hs00951967_g1 |                |
| 6      | KRT17       | Hs00356958_m1 |                |
| 7      | IL-23A      | Hs00900828_g1 |                |
| 8      | DNMT1       | Hs00945899_m1 |                |
| 9      | DNMT3A      | Hs01027166_m1 |                |
| 10     | DNMT3B      | Hs00171876_m1 |                |
| 11     | TET1        | Hs04189344_g1 |                |
| 12     | TET2        | Hs00325999_m1 |                |
| 13     | TET3        | Hs00896441_m1 |                |
| 14     | HDAC9       | Hs01081558_m1 |                |
| 15     | 18s rRNA    | Hs99999901_s1 |                |

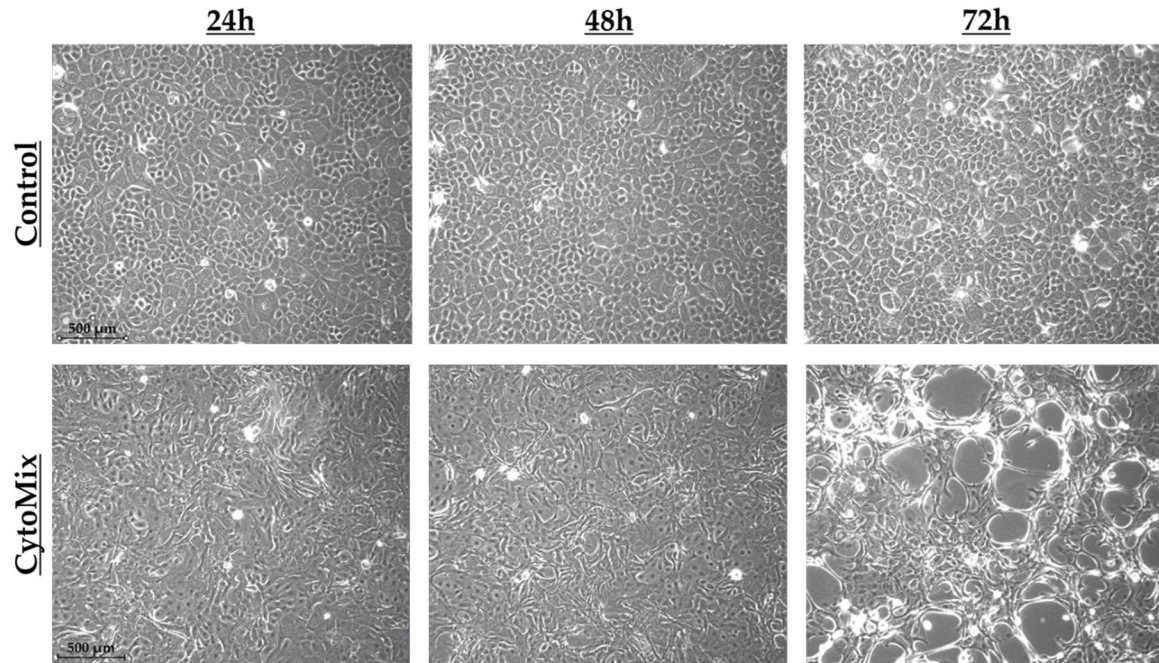

**Figure S1. Morphological changes in severely inflamed keratinocytes.** . To induce severe inflammation, KCs were treated with 10X CytoMix for 24, 48, and 72 hours. The representative images of three biological replicates are shown under transmitted light microscopy (n=3). Scale bars are 500  $\mu\text{m}$  in Control and CytoMix groups.

**Table S2. Enriched pathways in mildly and severely inflamed keratinocytes (KCs) compared to controls across biological process (BP), cellular component (CC), and molecular function (MF) categories..** Abbreviations: BP, biological process, CC, cellular component; MF, molecular function; KCs, keratinocytes.

| Group                 | Go term                                      | p value     | Functional group | Number of Genes |
|-----------------------|----------------------------------------------|-------------|------------------|-----------------|
| Mildly-inflamed KCs   | tissue development                           | 5.6839E-18  | BPs              | 167             |
|                       | inflammatory response                        | 3.8299E-13  |                  | 77              |
|                       | myeloid leukocyte activation                 | 1.4831E-14  |                  | 74              |
|                       | skin development                             | 5.6667E-28  |                  | 75              |
|                       | taxis                                        | 1.5593E-09  |                  | 62              |
|                       | cytoplasmic vesicle part                     | 6.0089E-14  | CCs              | 119             |
|                       | vesicle                                      | 3.3224E-18  |                  | 280             |
|                       | tertiary granule                             | 1.7841E-05  |                  | 20              |
|                       | lysosome                                     | 7.3392E-05  |                  | 49              |
|                       | plasma membrane                              | 6.4435E-11  |                  | 302             |
|                       | interleukin-1 receptor binding               | 1.9859E-06  | MFs              | 7.00            |
|                       | cytokine receptor binding                    | 1.7496E-07  |                  | 32.00           |
|                       | serine-type endopeptidase inhibitor activity | 7.0770E-06  |                  | 15.00           |
|                       | RAGE receptor binding                        | 2.1181E-05  |                  | 5.00            |
|                       | receptor binding                             | 2.6492E-05  |                  | 100.00          |
| Group                 | Go term                                      | p value     | Functional group | Number of Genes |
| Severely-inflamed KCs | cellular nitrogen compound metabolic process | 2.8466E-42  | BPs              | 2536.00         |
|                       | intracellular transport                      | 9.7072E-22  |                  | 804.00          |
|                       | gated channel activity                       | 1.2215E-15  |                  | 77.00           |
|                       | negative regulation of biological process    | 3.4488E-12  |                  | 2048.00         |
|                       | organonitrogen compound metabolic process    | 9.8856E-29  |                  | 2604.00         |
|                       | intracellular part                           | 4.3187E-142 | CCs              | 5190.00         |
|                       | mitochondrion                                | 1.06014E-28 |                  | 792.00          |
|                       | cell periphery                               | 2.72435E-26 |                  | 1491.00         |
|                       | organelle membrane                           | 1.62322E-16 |                  | 1137.00         |
|                       | extracellular exosome                        | 2.00502E-11 |                  | 1087.00         |
|                       | cation channel activity                      | 3.7769E-16  | MFs              | 42.00           |
|                       | G-protein coupled receptor activity          | 3.1626E-78  |                  | 67.00           |
|                       | methyltransferase activity                   | 7.9790E-08  |                  | 110.00          |
|                       | serine-type endopeptidase activity           | 2.8176E-07  |                  | 57.00           |
|                       | nucleotide binding                           | 3.9468E-05  |                  | 909.00          |

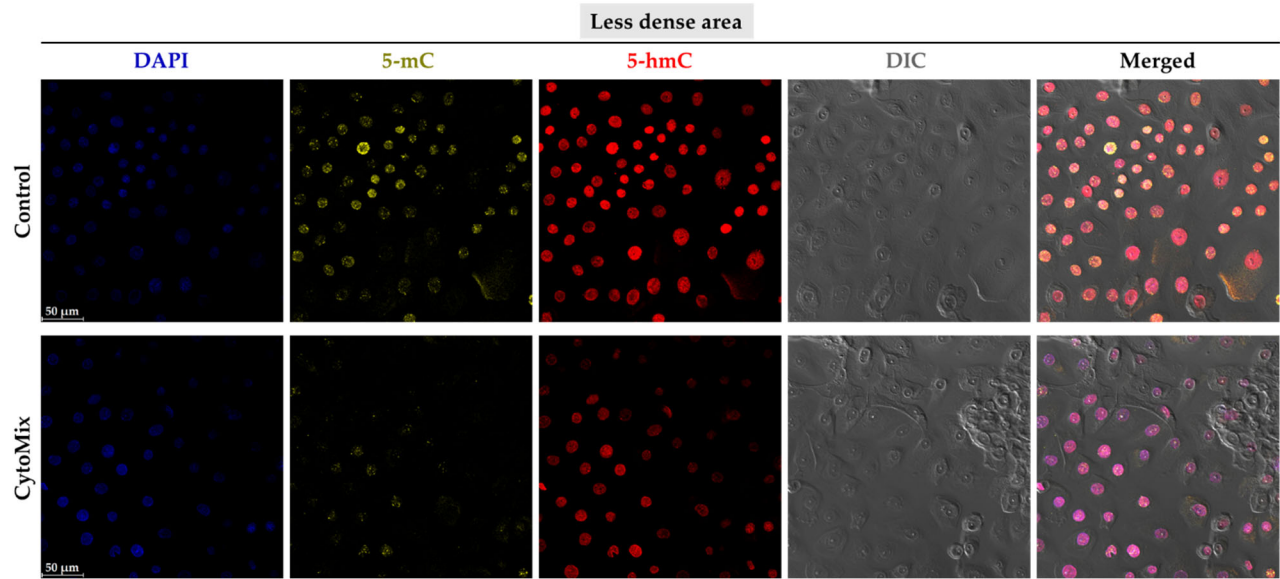

**Figure S2. Differential 5-mC and 5-hmC patterns in keratinocytes treated with/without CytoMix in low density areas.** The KCs were seeded at a density of  $1.0\text{-}1.2 \times 10^5$  cells/well in 8-well slide chambers and were treated with or without CytoMix for 48 hours to induce mild inflammation. Then, the cells were fixed with 4% PFA and stained for 5-mC (in yellow) and 5-hmC (in red). The nuclei were stained with DAPI (in blue). The confocal microscopy images were taken from control and CytoMix-treated KCs (n=3). Scale bars are 50  $\mu\text{m}$  in both control and CytoMix panels.
